# Supplementary material
Source: HighWire-hosted journal article supplement (https://emj.bmj.com/content/34/4/237)
Supplement: inline-supplementary-material-1 [file inline-supplementary-material-1.pdf]

# Procedural Sedation & Analgesia in ED (translated from Dutch)

|                           |                  |                                  |                                                                  |
|---------------------------|------------------|----------------------------------|------------------------------------------------------------------|
| <b>Date:</b>              |                  | <b>Specialty:</b>                |                                                                  |
| <b>Sedating doctor:</b>   |                  | <b>Title:</b>                    | <input type="checkbox"/> EM Resident <input type="checkbox"/> EP |
| <b>Procedural doctor:</b> |                  | <b>Procedure:</b>                |                                                                  |
| <b>Patient</b>            |                  |                                  |                                                                  |
| ID nr                     |                  | weight                           | .....kg height .....cm                                           |
| Date of birth             | M / F            | Past Medical History             |                                                                  |
| Allergies                 |                  | Medication                       |                                                                  |
| Last intake               | Food .. : ... hr | Clear fluids                     | .. : ... hr                                                      |
| ASA classification        | I II III IV      | difficult mask ventilation score | 0-1 ≥ 2                                                          |

| <b>Medication</b>       | drug                                                                                                                               | route | dose               |              |
|-------------------------|------------------------------------------------------------------------------------------------------------------------------------|-------|--------------------|--------------|
| sedative                |                                                                                                                                    |       | 1st dose.....mg    | total.....mg |
| analgesic               |                                                                                                                                    |       | total.....mg / mcg |              |
| co-medication           |                                                                                                                                    |       |                    |              |
| O <sub>2</sub> delivery | <input type="checkbox"/> None <input type="checkbox"/> Nasal 2-4L <input type="checkbox"/> NRM 15L <input type="checkbox"/> Other: |       |                    |              |

| <b>Vital signs</b>                         |    |                                                                                                                                   |   |    |    |    | <b>Adverse events →</b>                                | <b>Intervention</b> |
|--------------------------------------------|----|-----------------------------------------------------------------------------------------------------------------------------------|---|----|----|----|--------------------------------------------------------|---------------------|
| Start Time = .... : .... (giving sedative) |    |                                                                                                                                   |   |    |    |    | <input type="checkbox"/> hospital admission due to PSA |                     |
| Depth of sedation                          |    | <input type="checkbox"/> minimal <input type="checkbox"/> moderate <input type="checkbox"/> deep <input type="checkbox"/> general |   |    |    |    | <input type="checkbox"/> aspiration                    |                     |
| Ketamine sedation score                    |    | <input type="checkbox"/> non dissociative <input type="checkbox"/> dissociative                                                   |   |    |    |    | <input type="checkbox"/> agitation                     |                     |
| Time                                       | -5 | 0                                                                                                                                 | 5 | 10 | 15 | 20 | <input type="checkbox"/> airway obstruction            |                     |
| RR                                         |    |                                                                                                                                   |   |    |    |    | <input type="checkbox"/> apnoea>20s                    |                     |
| Sat%                                       |    |                                                                                                                                   |   |    |    |    | <input type="checkbox"/> sat < 90% >60s                |                     |
| BP                                         |    |                                                                                                                                   |   |    |    |    | <input type="checkbox"/> syst < 90 mmHg                |                     |
| HR                                         |    |                                                                                                                                   |   |    |    |    | <input type="checkbox"/> HR < 50 /min                  |                     |
| End Time = .... : ....                     |    |                                                                                                                                   |   |    |    |    | <input type="checkbox"/> other:                        |                     |

Possible interventions: Tactile stimulation O<sub>2</sub> Airway Manoeuvres Ventilation Intubation Medication

| <b>Patient comfort</b> |         | <b>Procedure</b>     |                           |
|------------------------|---------|----------------------|---------------------------|
| NRS max during PSA     | (0-10)  | Success of procedure | yes / no                  |
| Amnesia                | yes/ no | Difficulty procedure | easy / normal / difficult |
|                        |         |                      |                           |

|                                                                                           |
|-------------------------------------------------------------------------------------------|
| <b>Remarks</b> (always describe intervention after an adverse event, as well as severity) |
| <br><br><br><br><br><br><br><br><br><br>                                                  |

## ASA classification

|     |                                                                                                                          |
|-----|--------------------------------------------------------------------------------------------------------------------------|
| I   | Normal healthy patient                                                                                                   |
| II  | Patients with mild systemic disease (e.g. well controlled hypertension, DM)                                              |
| III | Patients with severe systemic disease that is limiting but not incapacitating (e.g. angina, poorly controlled DM)        |
| IV  | Patients with incapacitating disease which is a constant threat to life (e.g. cardiac failure, end stage kidney failure) |
| V   | mordibund patients not expected to live more than 24 hours                                                               |

## Depth of sedation

|          |                                                                          |
|----------|--------------------------------------------------------------------------|
| Minimal  | anxiolysis, normal response to verbal stimulation.                       |
| moderate | conscious sedation, purposeful response to verbal or tactile stimulation |
| deep     | purposeful response to repeated or painful stimuli*                      |
| general  | unarousable                                                              |

\* reflex withdrawal from a painful stimuli is NOT considered a purposeful response

## Difficult mask ventilation

|           |     |
|-----------|-----|
| beard     | 1   |
| BMI > 26  | 1   |
| No teeth  | 1   |
| age > 55  | 1   |
| snoring   | 1   |
| Low risk  | 0-1 |
| High risk | ≥ 2 |

## Body Mass Index

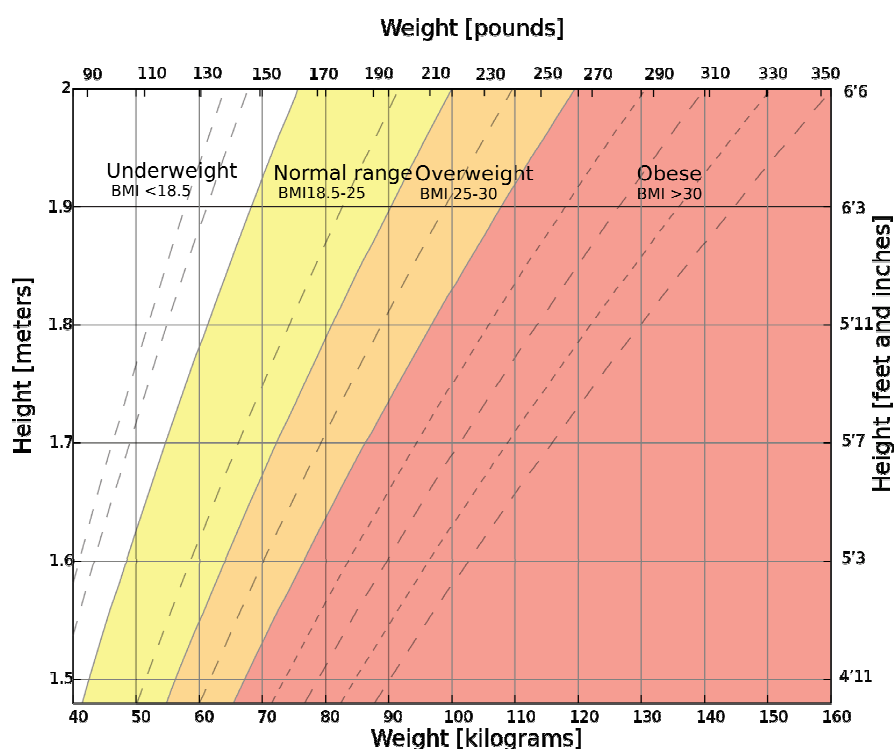

## End time – discharge criteria

| adults                                                      | children               |
|-------------------------------------------------------------|------------------------|
| level of consciousness as before sedation                   | Can talk (conform age) |
| Can eat and drink, no nausea, pain well under control       | Can sit (conform age)  |
| Vital signs stable (breathing, circulation)                 |                        |
| Minimum of 2 hours after administration of a reversal agent |                        |
