# Supplementary material
Source: HighWire-hosted journal article supplement (https://emj.bmj.com/content/34/4/237)
Supplement: inline-supplementary-material-2 [file inline-supplementary-material-2.pdf]

**Supplementary table 1.** Number and success of procedures in patients undergoing procedural sedation in the emergency department (n=1711)

|                        | <b>Cases</b>      | <b>Success of procedure</b> |              |
|------------------------|-------------------|-----------------------------|--------------|
|                        | <b>n (%)</b>      | <b>%</b>                    | <b>n†</b>    |
| Dislocation – hip      | 499 (29.2)        | 83.7                        | 485          |
| Dislocation – shoulder | 447 (26.1)        | 88.3                        | 436          |
| Dislocation – elbow    | 97 (5.7)          | 92.4                        | 92           |
| Dislocation – jaw      | 16 (0.9)          | 93.8                        | 16           |
| Dislocation – other    | 31 (1.8)          | 83.3                        | 30           |
| Fracture – arm         | 107 (6.3)         | 95.2                        | 104          |
| Fracture – leg         | 135 (7.9)         | 92.4                        | 132          |
| Abscess drainage       | 251 (14.7)        | 99.2                        | 249          |
| Cardioversion          | 18 (1.1)          | 94.1                        | 17           |
| Chest drainage         | 36 (2.1)          | 97.2                        | 36           |
| Lumbar puncture        | 8 (0.5)           | 87.5                        | 8            |
| Radiology – CT scan    | 4 (0.2)           | 100                         | 3            |
| Wound repair           | 3 (0.2)           | 100                         | 3            |
| Other                  | 50 (2.9)          | 95.9                        | 49           |
| Missing procedure      | 9 (0.5)           | 100                         | 8            |
| <b>Total</b>           | <b>1711 (100)</b> | <b>90.1</b>                 | <b>1668†</b> |

†Due to missing data, this is the total number of cases included in analysis of this variable (denominator).
